# Supplementary material for: Genetic Polymorphisms Associated with the Neutrophil–Lymphocyte Ratio and Their Clinical Implications for Metabolic Risk Factors
Source: PubMed Central journal article supplement (PMC6111840; doi:10.3390/jcm7080204), 2018-08-08
Supplement: jcm-07-00204-s001.pdf [file jcm-07-00204-s001.pdf]

## Supplementary materials: Genetic Polymorphisms Associated with the Neutrophil-Lymphocyte Ratio and Their Clinical Implications for Metabolic Risk Factors

Table S1. SNPs associated with the log-transformed NLR.

|            |    |           |              |                    | Discovery |       |          |       |       |        |                          | Validation             |       |          |       |       |        |                                |          |
|------------|----|-----------|--------------|--------------------|-----------|-------|----------|-------|-------|--------|--------------------------|------------------------|-------|----------|-------|-------|--------|--------------------------------|----------|
| SNP        | Ch | Position  | Nearest gene | Minor/major allele | INFO      | MAF   | Mean NLR |       |       | Beta   | 95% CI<br>(lower, upper) | P                      | MAF   | Mean NLR |       |       | Beta   | CI<br>95% CI<br>(lower, upper) | P value  |
|            |    |           |              |                    |           |       | DD       | DR    | RR    |        |                          |                        |       | DD       | DR    | RR    |        |                                |          |
| rs76181728 | 12 | 112437124 | TMEM116      | A/G                | 0.997     | 0.058 | 1.924    | 1.715 | 1.479 | -0.111 | -0.145,<br>-0.077        | 1.68x10 <sup>-10</sup> | 0.056 | 1.957    | 1.813 | 1.73  | -0.062 | -0.111,<br>-0.012              | 0.00749  |
| rs79945097 | 12 | 112470241 | NAA25        | A/G                | 1         | 0.059 | 1.924    | 1.717 | 1.479 | -0.11  | -0.144,<br>-0.076        | 2.29x10 <sup>-10</sup> | 0.057 | 1.957    | 1.813 | 1.781 | -0.060 | -0.109,<br>-0.011              | 0.00837  |
| rs76596471 | 12 | 112412518 | TMEM116      | C/T                | 0.999     | 0.058 | 1.923    | 1.717 | 1.479 | -0.11  | -0.144,<br>-0.076        | 2.68x10 <sup>-10</sup> | 0.056 | 1.957    | 1.816 | 1.73  | -0.060 | -0.11,<br>-0.011               | 0.00843  |
| rs7977554  | 12 | 112882859 | PTPN11       | A/G                | 0.990     | 0.055 | 1.922    | 1.725 | 1.595 | -0.103 | -0.138,<br>-0.068        | 1.19x10 <sup>-8</sup>  | 0.055 | 1.955    | 1.853 | 1.666 | -0.044 | -0.095,<br>0.006               | 0.04135  |
| rs7502539  | 17 | 38219005  | THRA         | A/G                | 0.997     | 0.337 | 1.96     | 1.866 | 1.79  | -0.049 | -0.065,<br>-0.032        | 1.13x10 <sup>-8</sup>  | 0.349 | 1.986    | 1.925 | 1.861 | -0.023 | -0.048,<br>0.001               | 0.03012  |
| rs7502233  | 17 | 38218804  | THRA         | G/A                | 1         | 0.34  | 1.96     | 1.868 | 1.79  | -0.048 | -0.064,<br>-0.032        | 1.79x10 <sup>-8</sup>  | 0.351 | 1.988    | 1.922 | 1.855 | -0.025 | -0.05,<br>0.001                | 0.020375 |

|            |    |          |       |     |       |       |       |       |       |        |                   |                       |       |       |       |       |        |                  |          |
|------------|----|----------|-------|-----|-------|-------|-------|-------|-------|--------|-------------------|-----------------------|-------|-------|-------|-------|--------|------------------|----------|
|            |    |          |       |     |       |       |       |       |       |        | -0.031            |                       |       |       |       |       |        | -0.001           |          |
| rs1879265  | 17 | 38231376 | THRA  | G/A | 0.993 | 0.387 | 1.967 | 1.879 | 1.796 | -0.046 | -0.062,<br>-0.03  | 3.73x10 <sup>-8</sup> | 0.398 | 1.965 | 1.948 | 1.87  | -0.022 | -0.046,<br>0.002 | 0.033725 |
| rs62065216 | 17 | 38218773 | THRA  | G/A | 1     | 0.463 | 1.967 | 1.899 | 1.811 | -0.044 | -0.06,<br>-0.029  | 3.77x10 <sup>-8</sup> | 0.475 | 1.991 | 1.942 | 1.88  | -0.027 | -0.05,<br>-0.004 | 0.01076  |
| rs2102928  | 17 | 38253228 | NR1D1 | T/C | 1     | 0.13  | 1.936 | 1.791 | 1.729 | -0.066 | -0.089,<br>-0.042 | 3.79x10 <sup>-8</sup> | 0.133 | 1.966 | 1.853 | 2.123 | -0.032 | -0.066,<br>0.002 | 0.03254  |

\* Adjusted for age, sex and BMI. ## Mean NLR: back-transformed value of log-transformed NLR. ### *P* values are based on the linear regression analysis of the log-transformed NLR and adjusted for age and sex. An additive genetic model was used.

**Table S2.** Linkage disequilibrium among the discovered SNPs.

|            |            | SNP   |       |          |  |
|------------|------------|-------|-------|----------|--|
| L1         | L2         | D     | R2    | Distance |  |
| rs76596471 | rs76181728 | 1     | 0.998 | 24606    |  |
| rs76596471 | rs79945097 | 0.998 | 0.996 | 57723    |  |
| rs76596471 | rs7977554  | 0.988 | 0.94  | 470341   |  |
| rs76181728 | rs79945097 | 1     | 0.998 | 33117    |  |
| rs76181728 | rs7977554  | 0.988 | 0.94  | 445735   |  |
| rs79945097 | rs7977554  | 0.988 | 0.942 | 412618   |  |
| rs62065216 | rs7502233  | 0.992 | 0.586 | 31       |  |
| rs62065216 | rs7502539  | 0.999 | 0.591 | 232      |  |
| rs62065216 | rs1879265  | 0.902 | 0.595 | 12603    |  |
| rs62065216 | rs2102928  | 0.881 | 0.135 | 34455    |  |
| rs7502233  | rs7502539  | 0.999 | 0.994 | 201      |  |

|           |           |       |       |       |
|-----------|-----------|-------|-------|-------|
| rs7502233 | rs1879265 | 0.655 | 0.35  | 12572 |
| rs7502233 | rs2102928 | 0.874 | 0.222 | 34424 |
| rs7502539 | rs1879265 | 0.656 | 0.35  | 12371 |
| rs7502539 | rs2102928 | 0.872 | 0.222 | 34223 |
| rs1879265 | rs2102928 | 0.939 | 0.209 | 21852 |

**Table S3.** SNPs associated with log-transformed NLR, WBC count, lymphocyte count, and neutrophil count.

|            |            | <b>log NLR</b>                                       | <b>log neutrophil count</b>                        | <b>log WBC count</b>              | <b>log lymphocyte count</b>                       |
|------------|------------|------------------------------------------------------|----------------------------------------------------|-----------------------------------|---------------------------------------------------|
| <b>SNP</b> | <b>Set</b> | <b>Beta (95% CI);<br/>P value</b>                    | <b>Beta (95% CI);<br/>P value</b>                  | <b>Beta (95% CI);<br/>P value</b> | <b>Beta (95% CI);<br/>P value</b>                 |
| rs76181728 | Total      | -0.095 (-0.123—0.067);<br>2.585x10 <sup>-11</sup>    | -0.045 (-0.069—0.02);<br>3.511 x10 <sup>-7</sup>   | -0.009 (-0.028—0.008);<br>0.284   | 0.051 (0.031—0.070);<br>2.873x10 <sup>-7</sup>    |
|            | Discovery  | -0.111 (-0.145—0.077);<br>1.68x10 <sup>-10</sup>     | -0.05756 (-0.087—0.028);<br>1.41x10 <sup>-4</sup>  | -0.0158 (-0.038—0.006);<br>0.15   | 0.0532 (0.03—0.077);<br>7.76x10 <sup>-6</sup>     |
|            | Validation | -0.062 (-0.111—0.012);<br>0.007                      | -0.0157 (-0.06—0.028);<br>0.24                     | 0.004313 (-0.028—0.037);<br>0.4   | 0.046 (0.012—0.08);<br>4.49x10 <sup>-3</sup>      |
| rs79945097 | Total      | -0.094 (-0.122—0.066);<br>4.184 x10 <sup>-11</sup>   | -0.043 (-0.068—0.019);<br>5.103 x10 <sup>-3</sup>  | -0.00909 (-0.027—0.009);<br>0.322 | 0.0505 (0.031—0.07);<br>2.527 x10 <sup>-7</sup>   |
|            | Discovery  | -0.11 (-0.144—0.076);<br>2.29x10 <sup>-10</sup>      | -0.05631 (-0.086—0.027);<br>1.90x10 <sup>-4</sup>  | -0.01506 (-0.037—0.007);<br>0.17  | 0.0534 (0.03—0.077);<br>6.87x10 <sup>-6</sup>     |
|            | Validation | -0.060 (-0.109—0.011);<br>; 0.008                    | -0.01449 (-0.058—0.029);<br>0.26                   | 0.004827 (-0.027—0.037);<br>0.38  | 0.0455 (0.011—0.08);<br>4.45x10 <sup>-3</sup>     |
| rs76596471 | Total      | -0.09402 (-0.122—0.066);<br>4.687 x10 <sup>-11</sup> | -0.0439 (-0.068—0.019);<br>4.575 x10 <sup>-4</sup> | -0.00946 (-0.028—0.009);<br>0.304 | 0.05015 (0.031—0.069);<br>3.416 x10 <sup>-7</sup> |
|            | Discovery  | -0.11 (-0.144—0.076);                                | -0.05612 (-0.086—0.027);                           | -0.01485 (-0.037—0.007);          | 0.0535 (0.03—0.077);                              |

|           |            |                                                    |                                                      |                                                     |                                                   |
|-----------|------------|----------------------------------------------------|------------------------------------------------------|-----------------------------------------------------|---------------------------------------------------|
|           |            | 2.68x10 <sup>-10</sup>                             | 2.04x10 <sup>-4</sup>                                | 0.18                                                | 7.02x10 <sup>-6</sup>                             |
|           | Validation | -0.060 (-0.11—0.011);<br>0.008                     | -0.0162 (-0.06—0.028);<br>0.24                       | 0.003392 (-0.029—0.036);<br>0.42                    | 0.0443 (0.01—0.079);<br>5.82x10 <sup>-3</sup>     |
| rs7977554 | Total      | -0.08378 (-0.113—0.055);<br>1.356x10 <sup>-8</sup> | -0.04239 (-0.068—0.017);<br>1.065x10 <sup>-3</sup>   | -0.01154 (-0.03—0.007);<br>0.226                    | 0.04141 (0.021—0.061);<br>4.771 x10 <sup>-5</sup> |
|           | Discovery  | -0.103 (-0.138—0.068);<br>1.19x10 <sup>-8</sup>    | -0.05544 (-0.086—0.025);<br>4.43x10 <sup>-4</sup>    | -0.01588 (-0.039—0.007);<br>0.17                    | 0.0476 (0.023—0.072);<br>1.30x10 <sup>-4</sup>    |
|           | Validation | -0.044 (-0.095—0.006);<br>0.041                    | -0.01561 (-0.06—0.029);<br>0.25                      | -0.002621 (-0.036—0.03);<br>0.44                    | 0.0288 (-0.006—0.064);<br>0.05                    |
| rs7502539 | Total      | -0.04055 (-0.054—0.027);<br>6.94 x10 <sup>-9</sup> | -0.042 (-0.054—0.03);<br>1.012 x10 <sup>-11</sup>    | -0.0257 (-0.034—0.017);<br>1.232 x10 <sup>-8</sup>  | -0.001 (-0.011—0.008);<br>0.807                   |
|           | Discovery  | 0.049 (-0.065—0.032);<br>1.13x10 <sup>-8</sup>     | -0.0504 (-0.065—0.036);<br>9.82x10 <sup>-12</sup>    | -0.03001 (-0.041—0.019);<br>3.22x10 <sup>-8</sup>   | -0.0019 (-0.013—0.01);<br>0.75                    |
|           | Validation | -0.023 (-0.048—0.001);<br>0.030                    | -0.02355 (-0.045—0.002);<br>0.02                     | -0.01685 (-0.033—0.001);<br>0.02                    | -3.00x10 <sup>-4</sup> (-0.017—0.017);<br>0.49    |
| rs7502233 | Total      | -0.0407 (-0.054—0.027);<br>5.867 x10 <sup>-9</sup> | -0.04204 (-0.054—0.03);<br>6.656 x10 <sup>-12</sup>  | -0.0259 (-0.035—0.017);<br>8.768 x10 <sup>-9</sup>  | -0.001 (-0.011—0.008);<br>0.7794                  |
|           | Discovery  | -0.048 (-0.064—0.031);<br>1.79x10 <sup>-8</sup>    | -0.05044 (-0.065—0.036);<br>8.72x10 <sup>-12</sup>   | -0.0303 (-0.041—0.02);<br>2.26x10 <sup>-8</sup>     | -0.0026 (-0.014—0.009);<br>0.65                   |
|           | Validation | -0.025 (-0.05—0.001);<br>0.020                     | -0.02438 (-0.046—0.003);<br>0.01                     | -0.01686 (-0.033—0.001);<br>0.02                    | 9.00x10 <sup>-4</sup> (-0.016—0.018);<br>0.46     |
| rs1879265 | Total      | -0.038 (-0.052—0.025);<br>2.648 x10 <sup>-8</sup>  | -0.03899 (-0.051—0.027);<br>8.850 x10 <sup>-11</sup> | -0.02372 (-0.032—0.015);<br>7.702 x10 <sup>-8</sup> | -0.001 (-0.01—0.009);<br>0.892                    |
|           | Discovery  | -0.046 (-0.062—0.03);<br>3.73x10 <sup>-8</sup>     | -0.04892 (-0.063—0.035);<br>1.54x10 <sup>-11</sup>   | -0.03017 (-0.041—0.02);<br>1.36x10 <sup>-8</sup>    | -0.0028 (-0.014—0.008);<br>0.62                   |
|           | Validation | -0.022 (-0.046—0.002); 0.034                       | -0.01792 (-0.039—0.003);0.05                         | -0.01006 (-0.026—0.005);0.1                         | 0.0043 (-0.012—0.021);                            |

|            |            |                                                     |                                                      |                                                      |                                    |
|------------|------------|-----------------------------------------------------|------------------------------------------------------|------------------------------------------------------|------------------------------------|
|            |            |                                                     |                                                      |                                                      | 0.3                                |
| rs62065216 | Total      | -0.039 (-0.052—0.026);<br>5.17 x10 <sup>-9</sup>    | -0.04252 (-0.054—0.031);<br>2.421 x10 <sup>-13</sup> | -0.02658 (-0.035—0.018);<br>4.704 x10 <sup>-10</sup> | -0.003775 (-0.013—0.005);<br>0.409 |
|            | Discovery  | -0.044 (-0.06—0.029);<br>3.77x10 <sup>-8</sup>      | -0.05157 (-0.065—0.038);<br>1.95x10 <sup>-13</sup>   | -0.03262 (-0.043—0.023);<br>2.31x10 <sup>-10</sup>   | -0.0072 (-0.018—0.004);<br>0.19    |
|            | Validation | -0.027 (-0.05—0.004);<br>0.011                      | -0.0237 (-0.044—0.003);<br>0.01                      | -0.01424 (-0.029—0.001);<br>0.03                     | 0.0032 (-0.013—0.019);<br>0.35     |
| rs2102928  | Total      | -0.05522 (-0.075—0.036);<br>2.108 x10 <sup>-8</sup> | -0.04849 (-0.065—0.032);<br>1.969 x10 <sup>-8</sup>  | -0.02621 (-0.039—0.014);<br>3.632 x10 <sup>-5</sup>  | 0.00674 (-0.007—0.02);<br>0.3208   |
|            | Discovery  | -0.066 (-0.089—0.042);<br>3.79x10 <sup>-8</sup>     | -0.05796 (-0.078—0.038);<br>2.77x10 <sup>-8</sup>    | -0.03134 (-0.046—0.016);<br>4.21x10 <sup>-5</sup>    | 0.0079 (-0.008—0.024);<br>0.34     |
|            | Validation | -0.032 (-0.066—0.002);<br>0.033                     | -0.02795 (-0.058—0.002);<br>0.03                     | -0.0154 (-0.038—0.007);<br>0.09                      | 0.0041 (-0.019—0.028);<br>0.37     |

\* Adjusted for age, sex and BMI. \* *P* values are based on the linear regression analysis of the log-transformed NLR and adjusted for age and sex. An additive genetic model was used.

**Table S4.** Case-control study of each metabolic risk according to the significant SNP.

| SNP        | <sup>a</sup> Elevated triglycerides |             |                | <sup>b</sup> Reduced HDL cholesterol |             |                | <sup>c</sup> Elevated fasting glucose |             |                |
|------------|-------------------------------------|-------------|----------------|--------------------------------------|-------------|----------------|---------------------------------------|-------------|----------------|
|            | OR                                  | 95% CI      | <i>P</i> value | OR                                   | 95% CI      | <i>P</i> value | OR                                    | 95% CI      | <i>P</i> value |
| rs76181728 | 1.098                               | 0.868~1.389 | 0.434          | 0.906                                | 0.715~1.149 | 0.416          | 1.054                                 | 0.866~1.284 | 0.599          |
| rs79945097 | 1.092                               | 0.863~1.381 | 0.462          | 0.923                                | 0.73~1.168  | 0.504          | 1.047                                 | 0.86~1.275  | 0.65           |
| rs76596471 | 1.11                                | 0.878~1.404 | 0.383          | 0.907                                | 0.716~1.15  | 0.421          | 1.061                                 | 0.871~1.292 | 0.555          |
| rs7977554  | 1.098                               | 0.859~1.403 | 0.456          | 0.833                                | 0.646~1.074 | 0.158          | 1.022                                 | 0.832~1.255 | 0.835          |
| rs7502539  | 0.953                               | 0.848~1.07  | 0.415          | 0.953                                | 0.85~1.069  | 0.409          | 1.019                                 | 0.926~1.123 | 0.696          |
| rs7502233  | 0.957                               | 0.853~1.075 | 0.462          | 0.958                                | 0.855~1.074 | 0.465          | 1.019                                 | 0.925~1.122 | 0.706          |
| rs1879265  | 0.918                               | 0.818~1.029 | 0.143          | 0.893                                | 0.798~1     | 0.05           | 0.955                                 | 0.868~1.051 | 0.349          |

---

|            |       |             |       |       |             |       |       |             |       |
|------------|-------|-------------|-------|-------|-------------|-------|-------|-------------|-------|
| rs62065216 | 0.935 | 0.837~1.044 | 0.231 | 0.906 | 0.813~1.01  | 0.075 | 0.975 | 0.889~1.069 | 0.593 |
| rs2102928  | 0.912 | 0.773~1.076 | 0.273 | 0.931 | 0.791~1.095 | 0.388 | 0.988 | 0.862~1.133 | 0.862 |

---

\* Adjusted for age, sex and BMI. \* Additive models were used for genotyping SNPs. <sup>a</sup> Elevated triglycerides (triglycerides  $\geq 150$  mg/dL). <sup>b</sup> Reduced high-density lipoprotein (HDL) cholesterol (males  $< 40$  mg/dL; females  $< 50$  mg/dL). <sup>c</sup> Elevated fasting glucose (fasting glucose  $\geq 100$  mg/dL or use of medications for hyperglycemia).

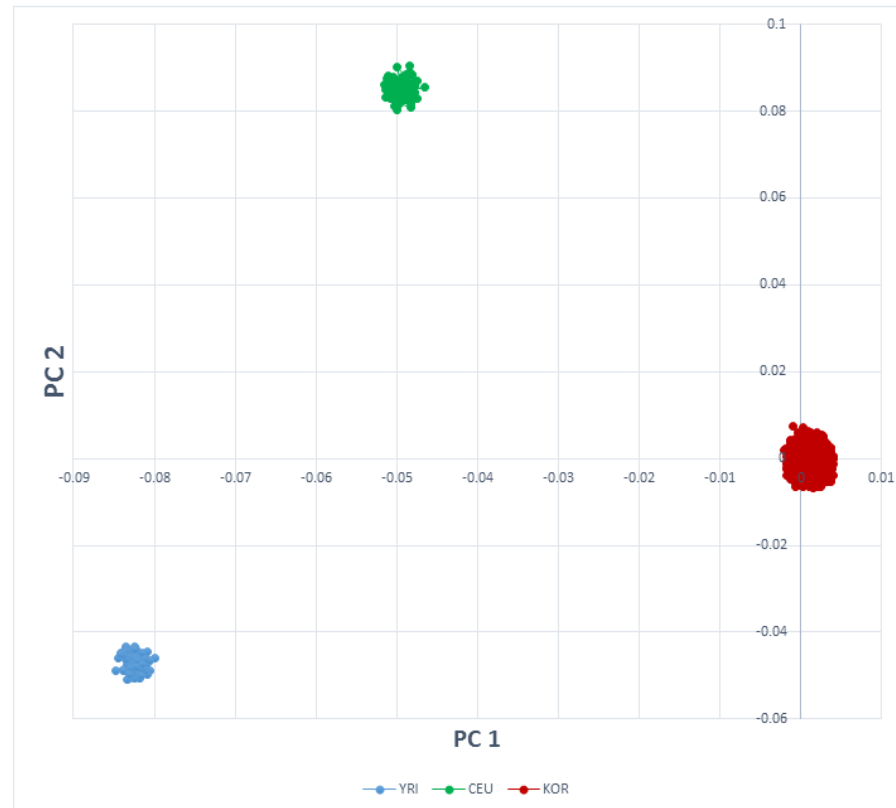

**Figure S1.** Principle component analysis (PCA) to adjust the population stratification. The total population of the GENIE database<sup>9</sup> was merged with the YRI and CEU data, which consisted of 1000 genomes, for the PCA. The criteria for marker selections were as follows: quality control of minor allele frequencies  $>0.05$ , call rates  $>0.05$ , Hardy-Weinberg equilibrium ( $P > 0.0001$ ), and autosome. In all, 220,222 overlapping markers were found among the datasets. We randomly selected 20% of the overlapping markers (43,979) for the PCA plot.

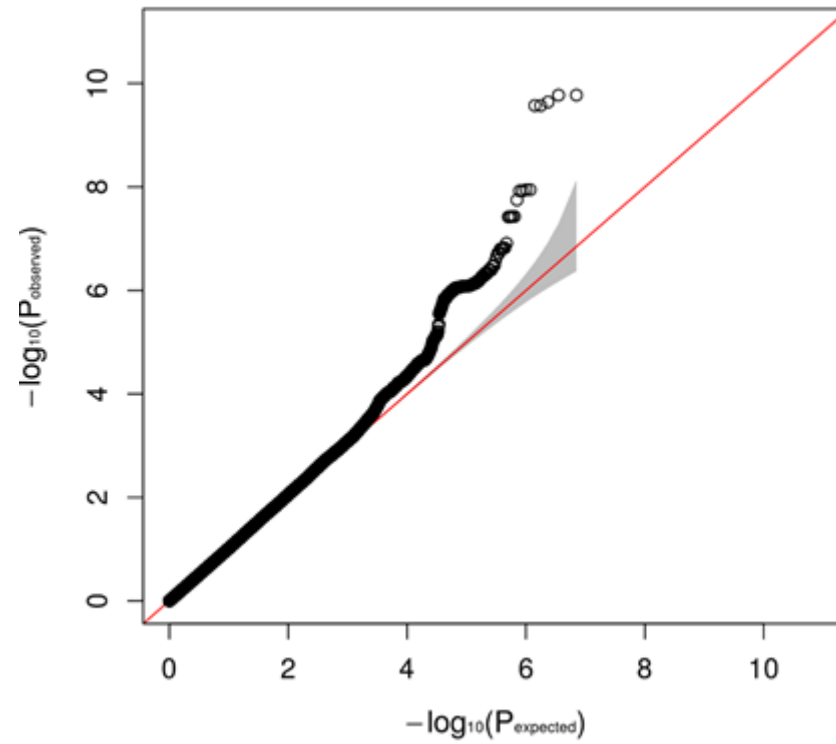

**Figure S2.** Q-Q plot of the log-transformed NLR genome-wide association study. The variance inflation factor (VIF) is 1.02, which suggests that the type-1 error is well controlled.



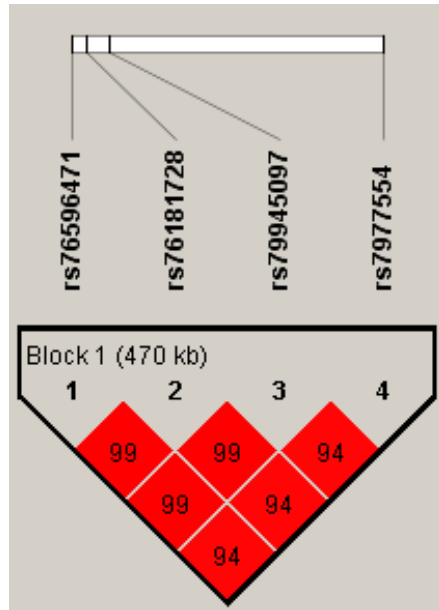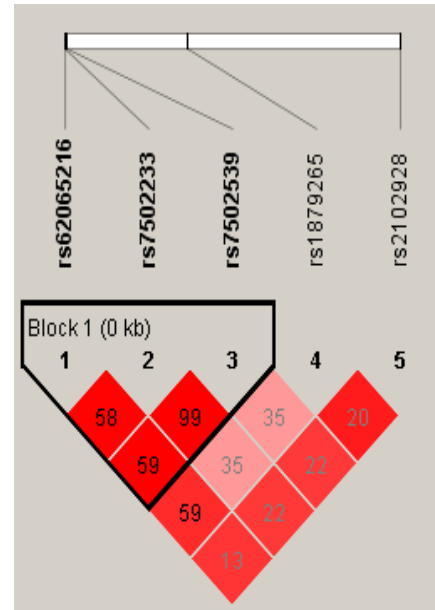

(a) Chromosome 12

(b) Chromosome 17

**Figure S3.** Linkage disequilibrium plot.

# rs76181728

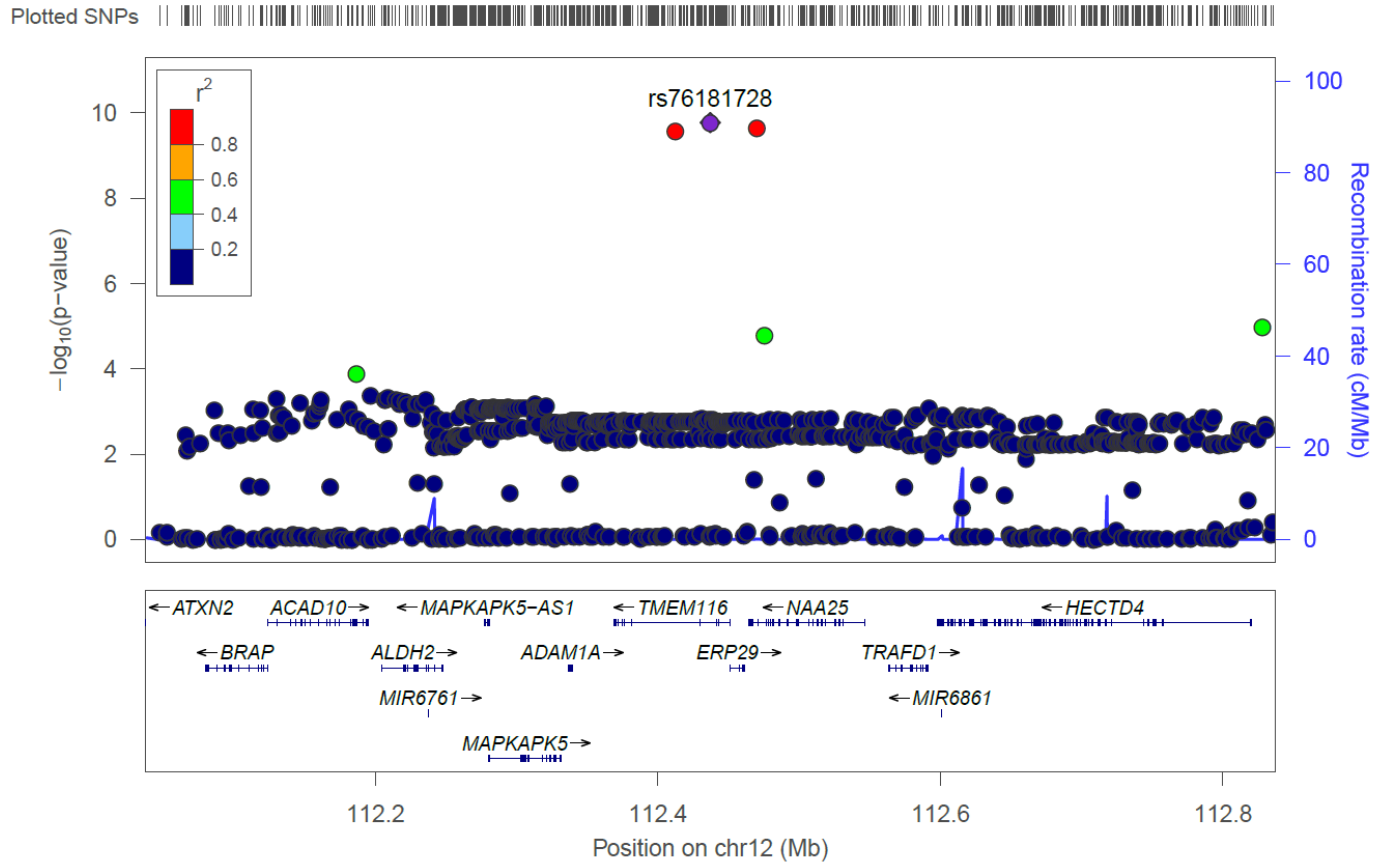

**Figure S4.** Regional plot for the top SNP rs76181728 associated with the log-transformed NLR.
